# Supplementary material for: Niobium-oxide-based octahedral molecular sieves as novel anode materials for sodium-ion batteries
Source: Royal Society of Chemistry journal article supplement (doi:10.1039/d5ma01026h), 2026-01-01
Supplement: d5ma01026h1.pdf [file d5ma01026h1.pdf]

## Supplementary Information

### **Niobium-oxide based octahedral molecular sieves as novel anode materials for sodium-ion batteries**

Y Bhaskara Rao, Naser Tavajohi\*, C. André Ohlin\*

Department of Chemistry, Umeå University, Umeå 90187, Sweden

---

\*Corresponding authors: [naser.tavajohi@umu.se](mailto:naser.tavajohi@umu.se), [andre.ohlin@umu.se](mailto:andre.ohlin@umu.se)

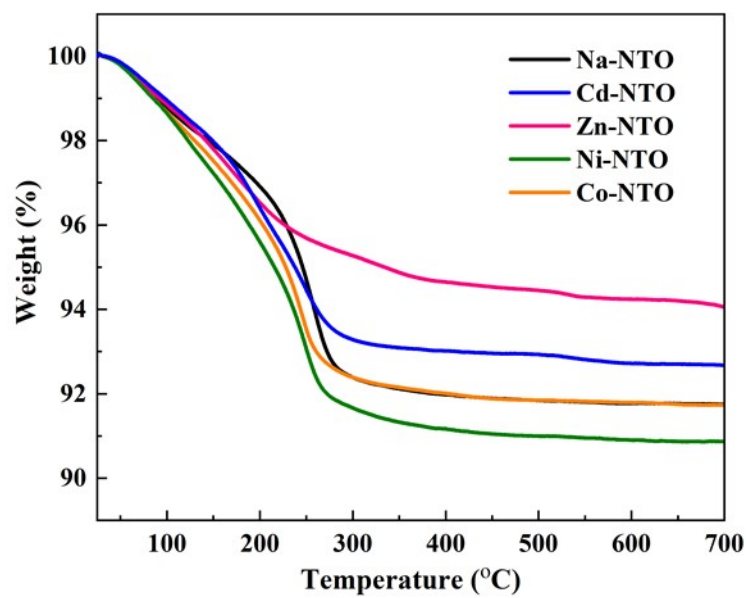

**Figure S1.** TGA spectra of Na-NTO, Cd-NTO, Zn-NTO, Ni-NTO, and Co-NTO materials.

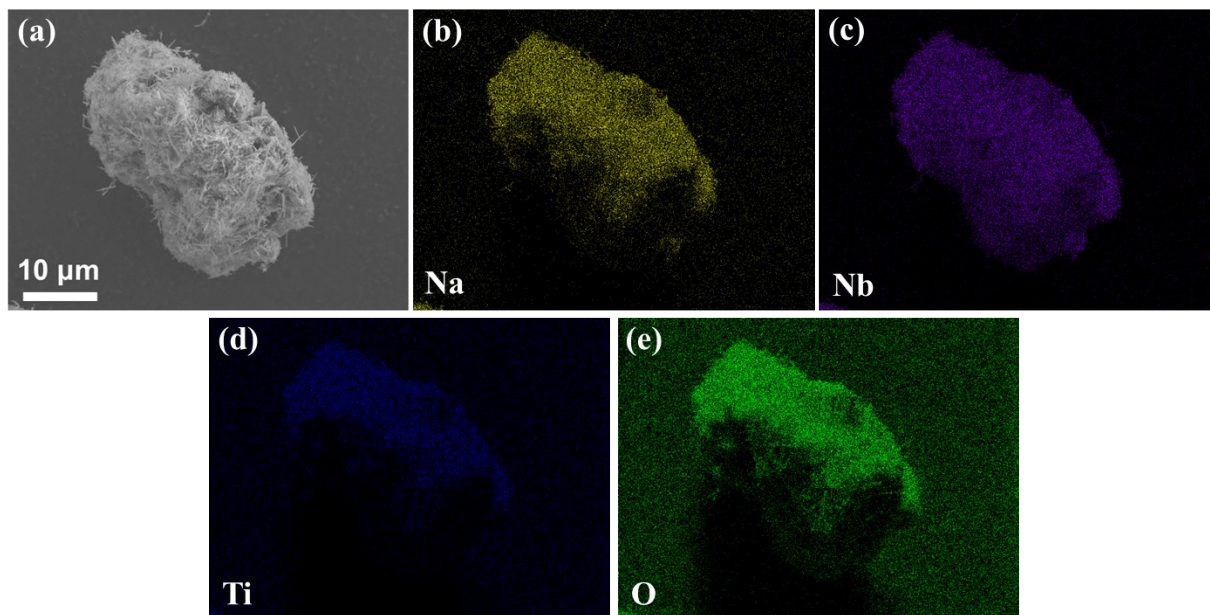

**Figure S2.** EDX images of Na-NTO material.

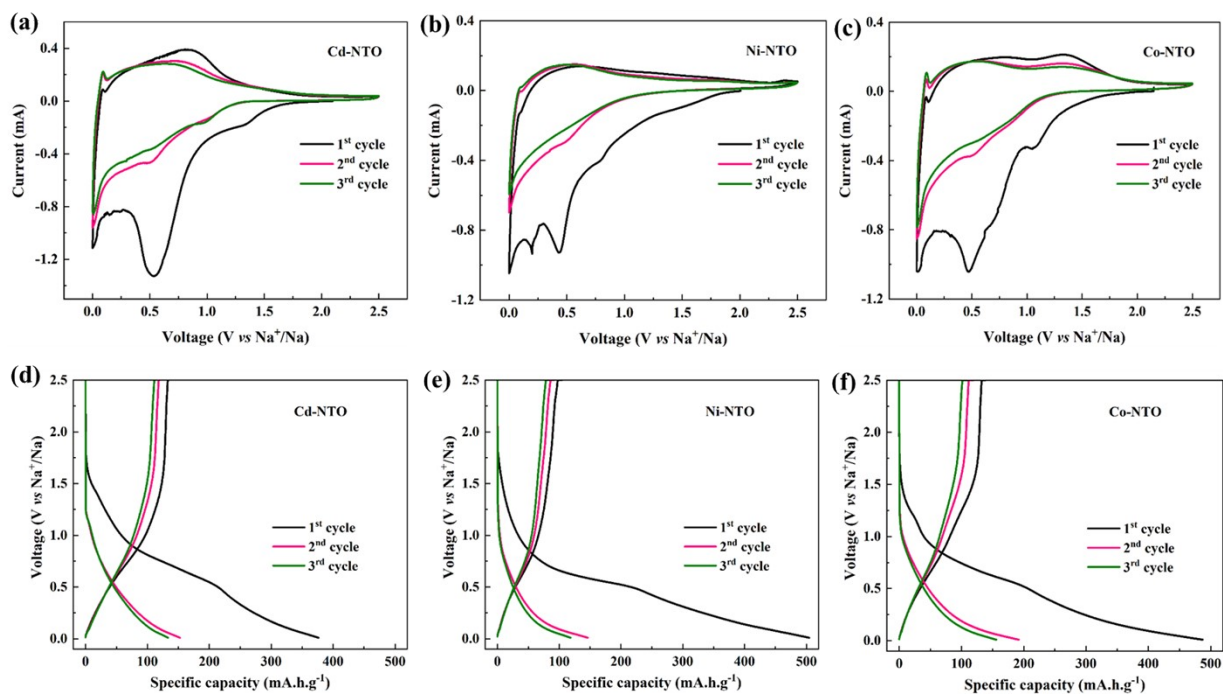

**Figure S3.** Cyclic voltammetry and galvanostatic charge-discharge curves of (a and d) Cd-NTO, (b and e) Ni-NTO and (c and f) Co-NTO materials for the first three cycles.

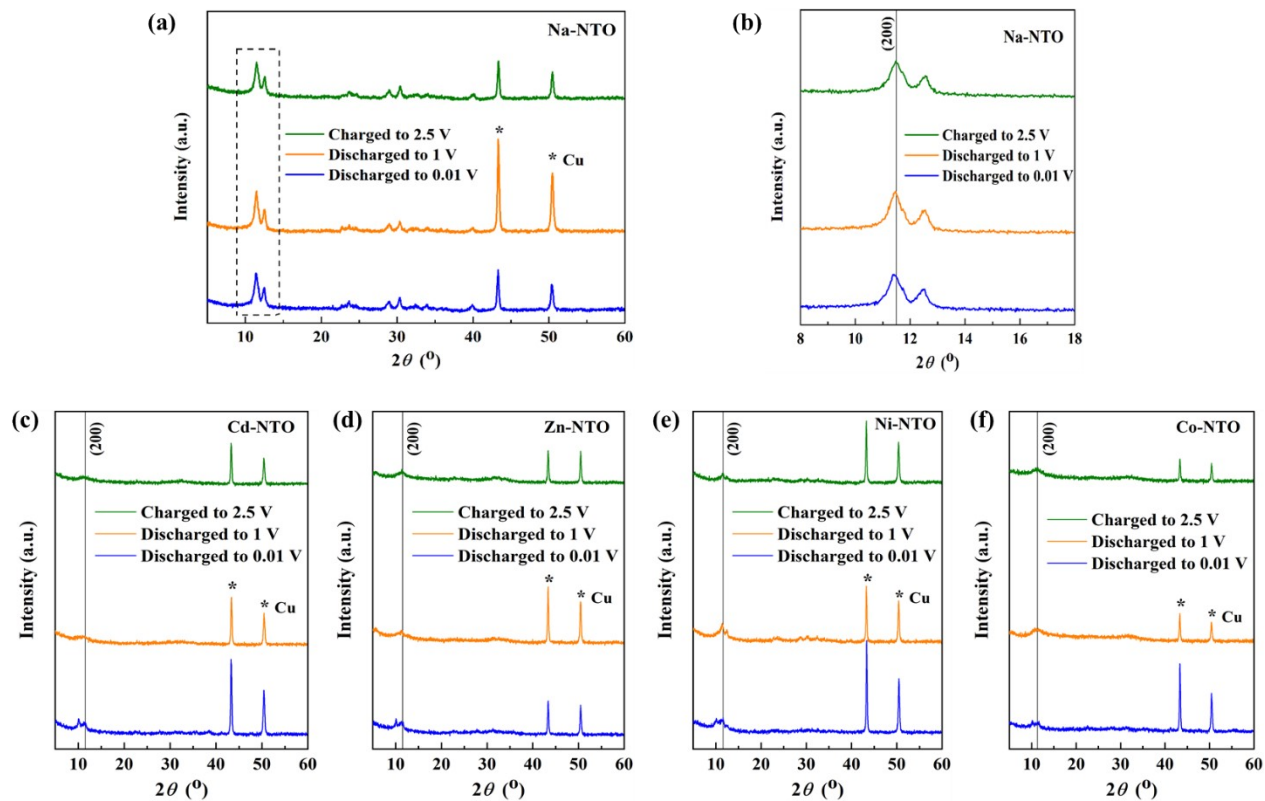

**Figure S4.** **a)** *Ex-situ* XRD patterns, and **b)** enlarged view of (200) diffraction peak for Na-NTO electrode, and *ex-situ* XRD patterns of **c)** Cd-NTO, **d)** Zn-NTO, **e)** Ni-NTO and **f)** Co-NTO electrodes at different charge/discharge states.

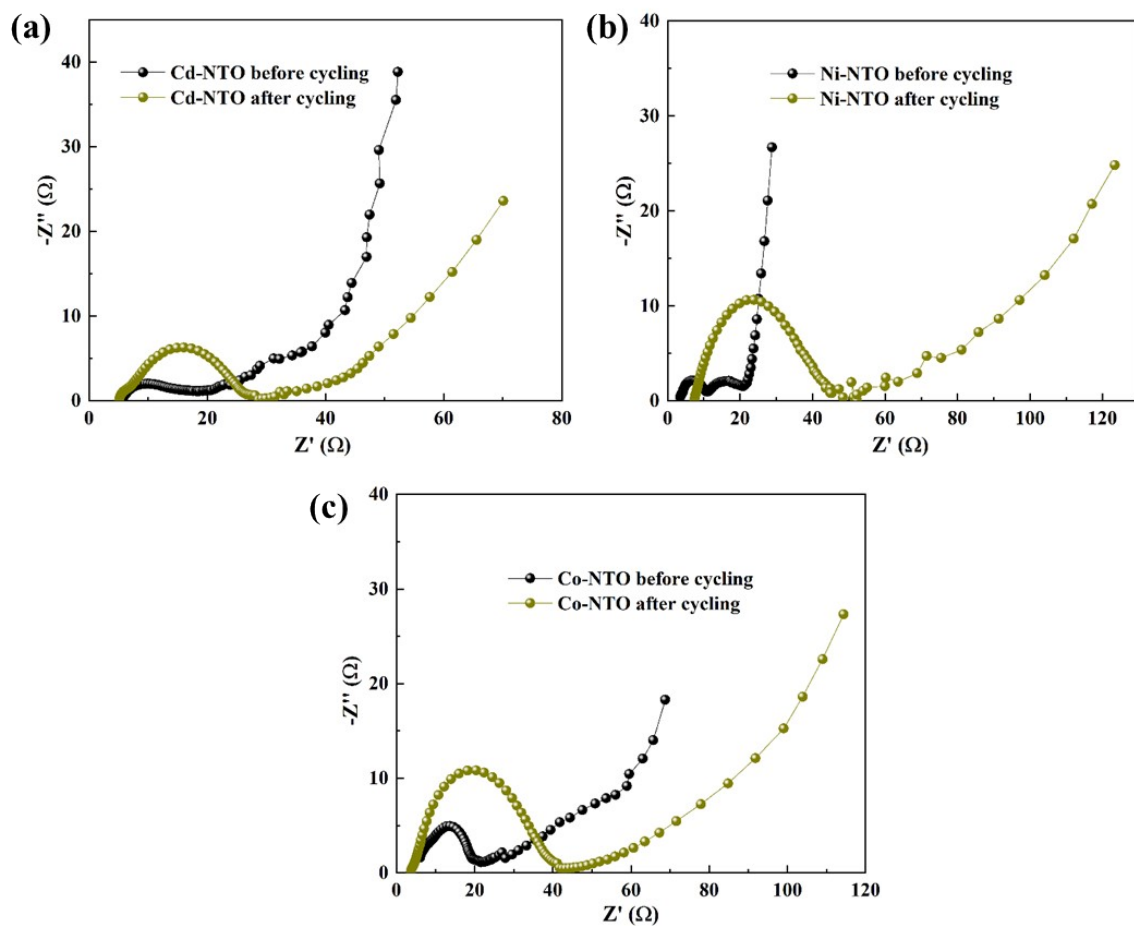

**Figure S5.** Nyquist plots of **a)** Cd-NTO, **b)** Ni-NTO and **c)** Co-NTO materials, before and after cycling.

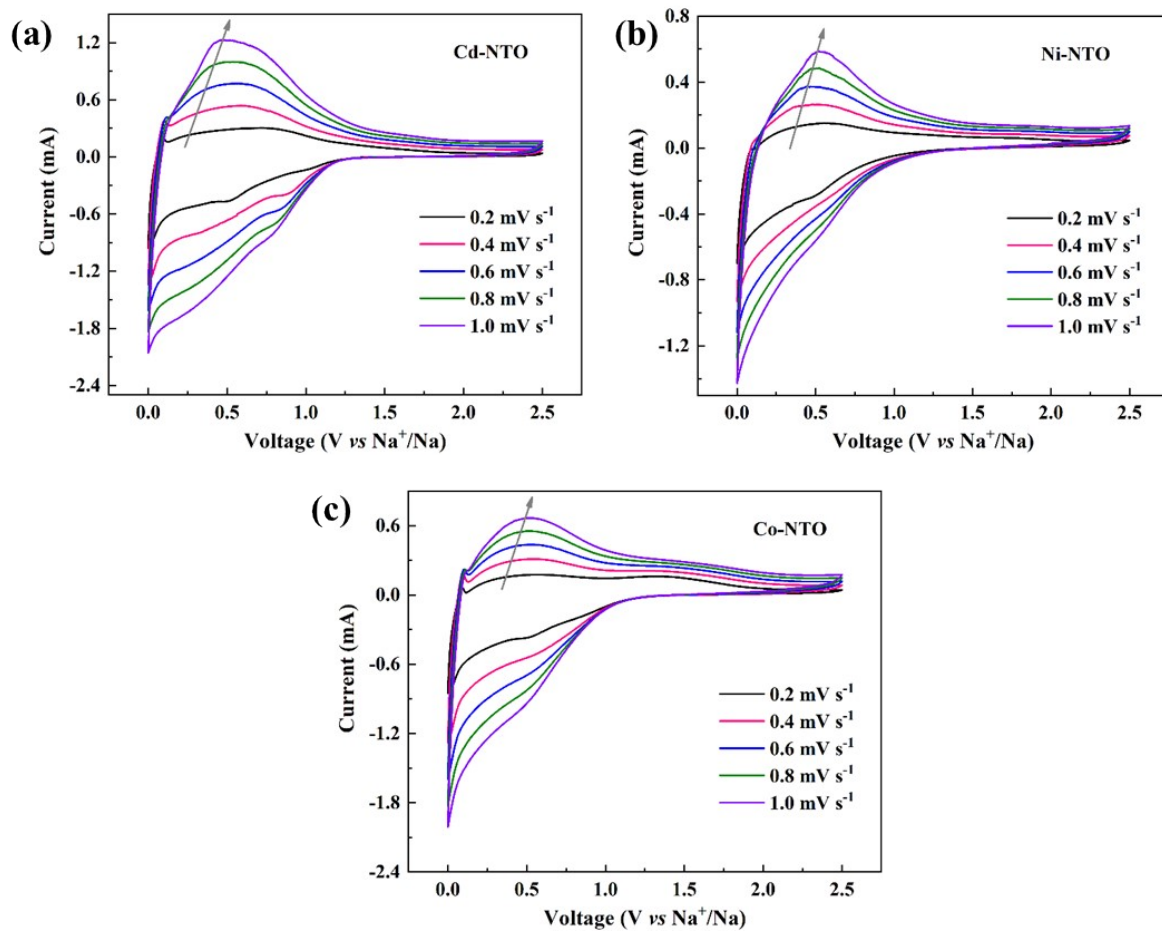

**Figure S6.** Cyclic voltammogram at various scan rates for **a)** Cd-NTO, **b)** Ni-NTO and **b)** Co-NTO materials.
